# Supplementary material for: Inhibition of LTA4H by bestatin in human and mouse colorectal cancer
Source: PubMed Central journal article supplement — eBioMedicine. 2019 May 10;44:361–74. doi: 10.1016/j.ebiom.2019.05.008 (PMC6604047; doi:10.1016/j.ebiom.2019.05.008), 2019-05-10
Supplement: mmc1.pdf [file mmc1.pdf]

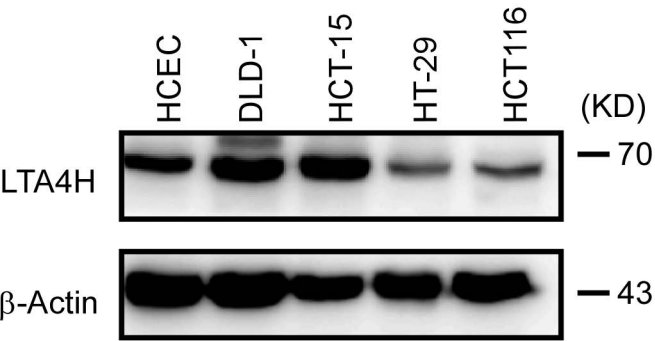

a

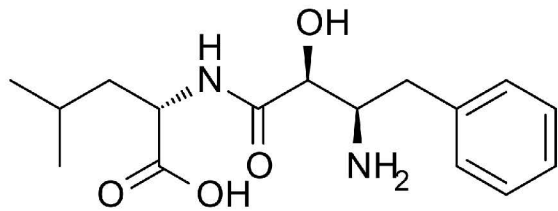

b

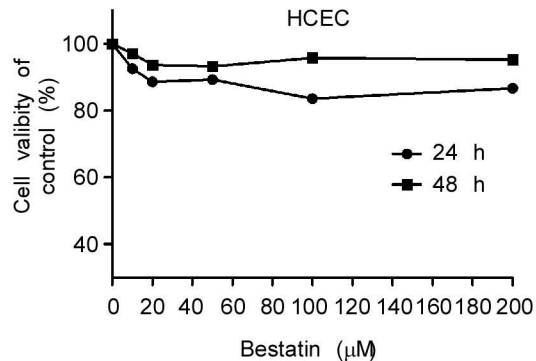

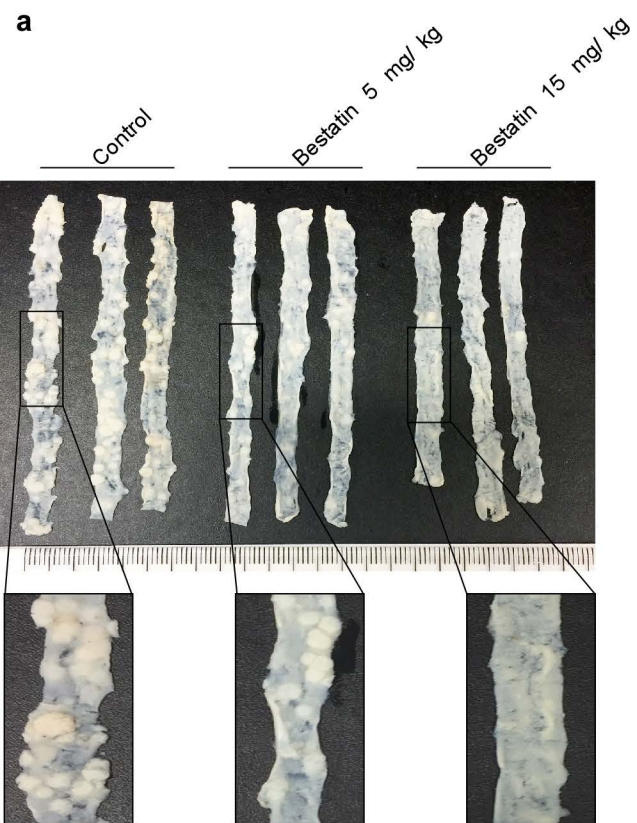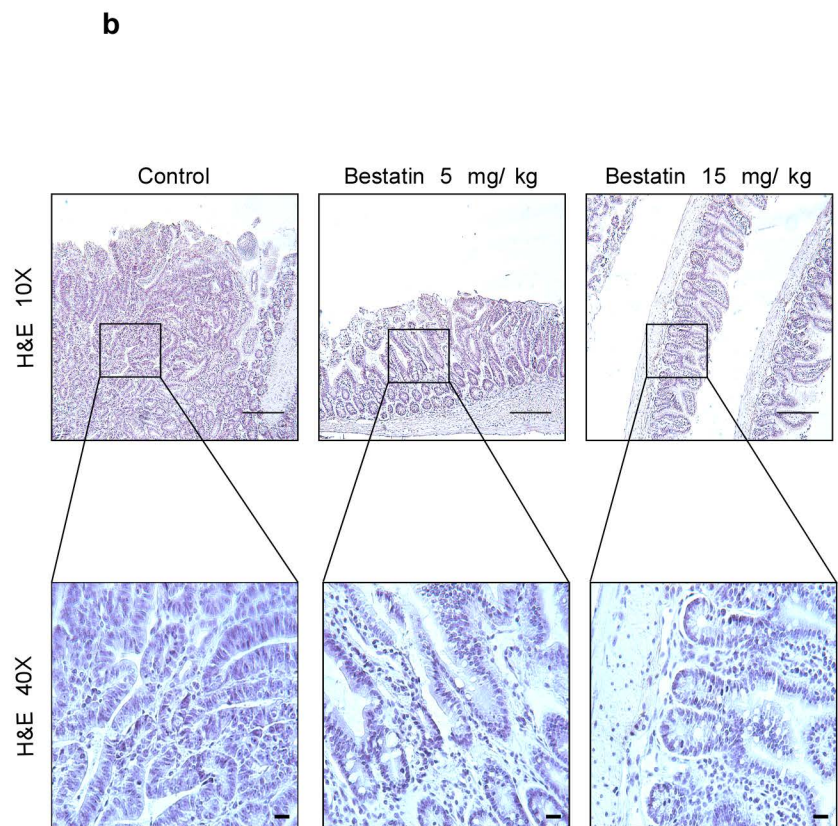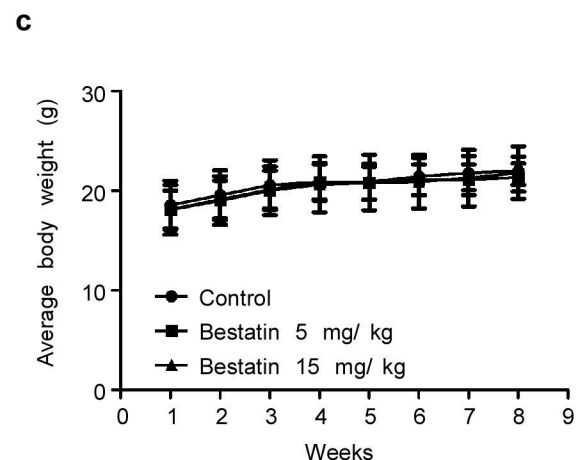

a

Control (a)

Bestatin 5 mg/ kg (b)

Bestatin 15 mg/ kg (c)

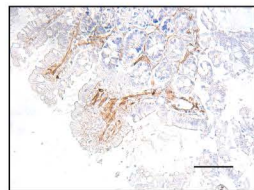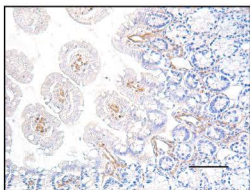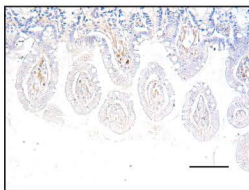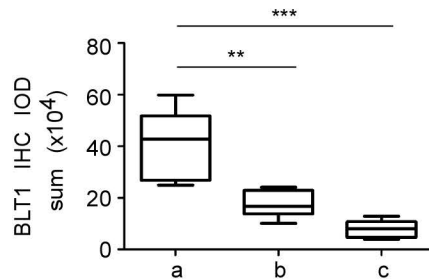

b

Control (a)

Bestatin 5 mg/ kg (b)

Bestatin 15 mg/ kg (c)

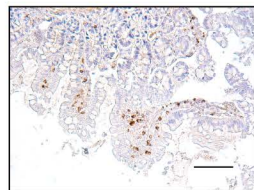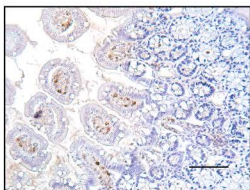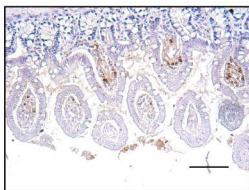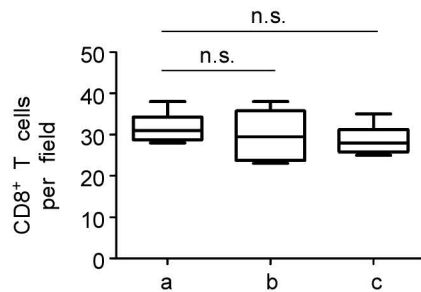

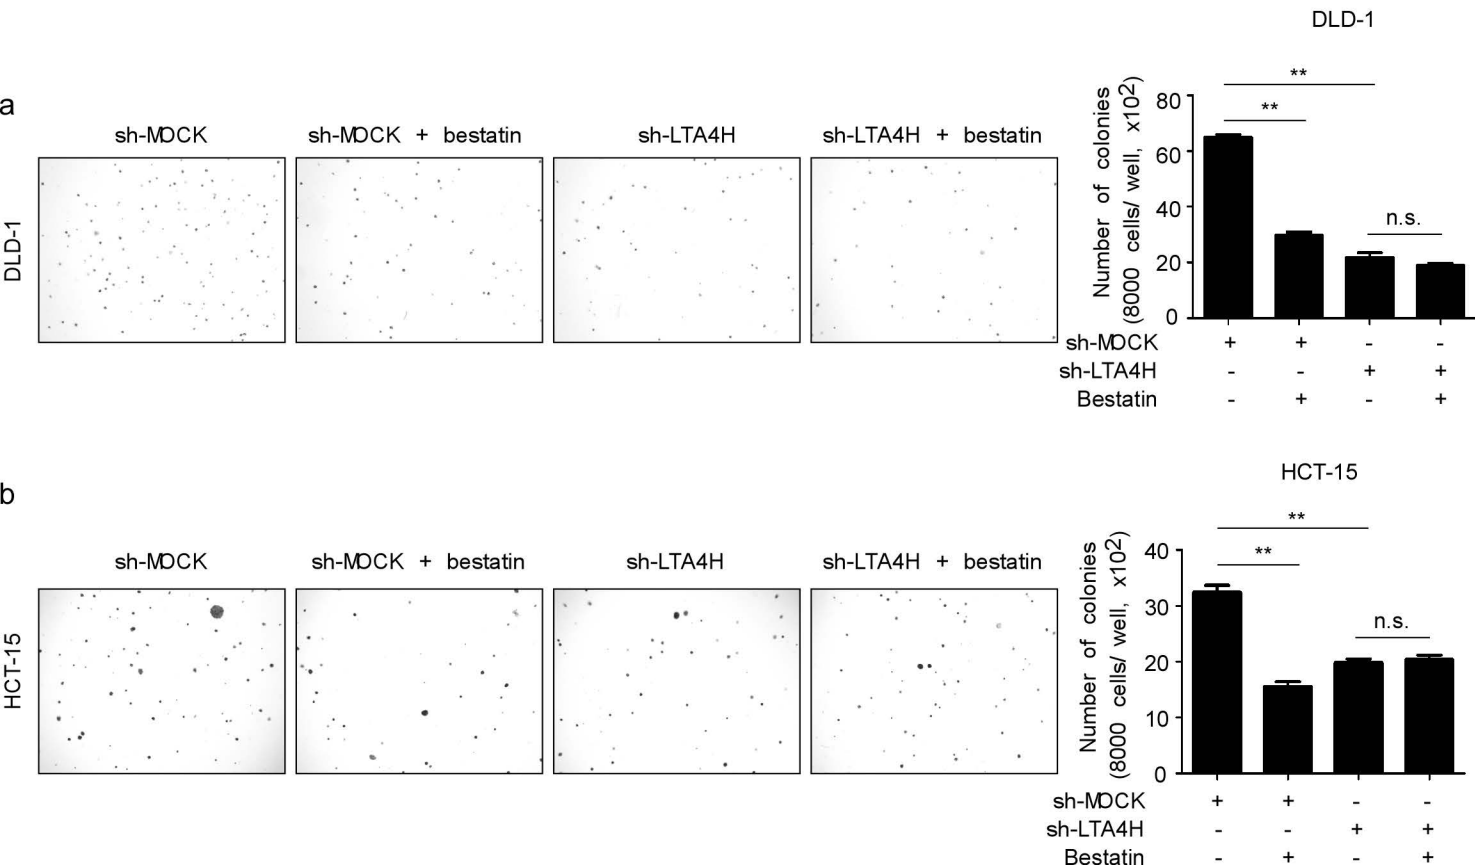

## Supplementary Figure Legends

### Fig. s1. LTA4H expression in human colon cancer cell lines

Protein levels of LTA4H were analyzed by Western blot in human colon cancer cell lines.

### Fig. s2. Bestatin is non-toxic to normal colon cells

(a) The structure of bestatin. (b) HCEC normal colon cells were treated with different concentrations of bestatin for 24 or 48 h and toxicity was estimated by a crystal violet staining assay.

### Fig. s3. Bestatin inhibits intestinal adenoma formation in $Apc^{Min/+}$ mice.

- (a) Representative photographs show tumor (polyp) formation in  $Apc^{Min/+}$  mice.
- (b) H&E staining of  $Apc^{Min/+}$  mouse intestine.
- (c) Bestatin had no effect on the body weight of bestatin-treated mice compared with control mice.

### Fig. s4. Bestatin inhibits BLT1 expression in CD8-positive stained tissues.

(a) BLT1 expression in  $Apc^{Min/+}$  mouse tissue were detected by immunohistochemistry and the representative cases are shown. The asterisks (\*\*, \*\*\*) indicate a significant ( $p < 0.01$ ,  $p < 0.001$ , respectively) difference (Scale bar, 100  $\mu$ m). (b) CD8 expression in  $Apc^{Min/+}$  mouse tissue was detected by immunohistochemistry and representative cases are shown (n.s. indicates no significant difference; Scale bar, 100 $\mu$ m).

### Fig. s5. Bestatin cannot inhibit colony formation of shLTA4H cells.

(a) DLD-1 cells expressing shMOCK or shLTA4H were treated with bestatin (50  $\mu$ M) and grown in

soft agar. The colony numbers were counted. The data are shown as mean values  $\pm$  S.E. from triplicate experiments. The asterisks (\*\*) indicate a significant ( $p < 0.01$ ) difference (n.s. indicates no significant difference). **(b)** HCT-15 cells expressing shMOCK or shLTA4H were treated with bestatin (50  $\mu$ M) and grown in soft agar. The colony numbers were counted. The data are showed as mean values  $\pm$  S.E. from triplicate experiments. The asterisks (\*\*) indicate a significant ( $p < 0.01$ ) difference (n.s. indicates no significant difference).
